# Supplementary material for: It takes a community: a landscape analysis of global health research consortia
Source: PubMed Central journal article supplement (PMC6703292; doi:10.1136/bmjgh-2019-001450), 2019-08-16
Supplement: bmjgh-2019-001450supp001.pdf [file bmjgh-2019-001450supp001.pdf]

**Supplementary File 1.** Key words for online searchGoogle search:

Health research network  
Global health research network  
Primary health care research network  
Health research consortium  
Global health research consortium  
Primary health care research consortium  
Health research coordinating center  
Global health research coordinating center  
Primary health care research coordinating center  
Health research hub  
Global health research hub  
Primary health care research hub  
Health research system  
Global health research system  
Primary health care research system  
Health research scientific advisory committee  
Global health research scientific advisory committee  
Primary health care research scientific advisory committee  
Health research steering group  
Global health research steering group  
Primary health care research steering group  
Health research collaboration  
Global health research collaboration  
Primary health care research collaboration  
Health research initiative  
Global health research initiative  
Primary health care research initiative  
Health research network initiative  
Global health research network initiative  
Primary health care research network initiative  
Health research partnership  
Global health research partnership  
Primary health care research partnership

Targeted region Google search:

Using term “health research consortium” and “health research network” (two of the most productive terms initially), we added in a targeted geographic arm to obtain fuller representation of LMIC World Bank regions.

[Central Europe OR Eastern Europe] AND health research network  
[Central Europe OR Eastern Europe] AND health research consortium  
[Central Europe OR Eastern Europe] AND primary health care research network  
[East Asia OR Pacific] AND health research network  
[East Asia OR Pacific] AND primary health care research network  
[East Asia OR Pacific] AND health research consortium  
[Latin America OR Caribbean] AND health research network

[Latin America OR Caribbean] AND health research consortium  
[Middle East OR North Africa] AND health research network  
[Middle East OR North Africa] AND health research consortium  
[Middle East OR North Africa] AND primary health care research network  
South Asia AND health research network  
South Asia AND health research consortium

Encyclopedia of Associations:

Global health research network  
Primary health care research network  
Global health research consortium  
Primary health care research consortium  
Global health research coordinating center  
Primary health care research coordinating center  
Global health research hub  
Primary health care research hub  
Global health research collaboration  
Primary health care research collaboration  
Global health research initiative  
Primary health care research initiative  
Global health research network initiative  
Primary health care research network initiative  
Global health research partnership  
Primary health care research partnership
